# Supplementary material for: Closed-Loop Control of a Neuroprosthetic Hand by Magnetoencephalographic Signals
Source: PubMed Central journal article supplement (PMC4489903; doi:10.1371/journal.pone.0131547), 2015-07-02
Supplement: pone.0131547.s001.pdf [file pone.0131547.s001.pdf]

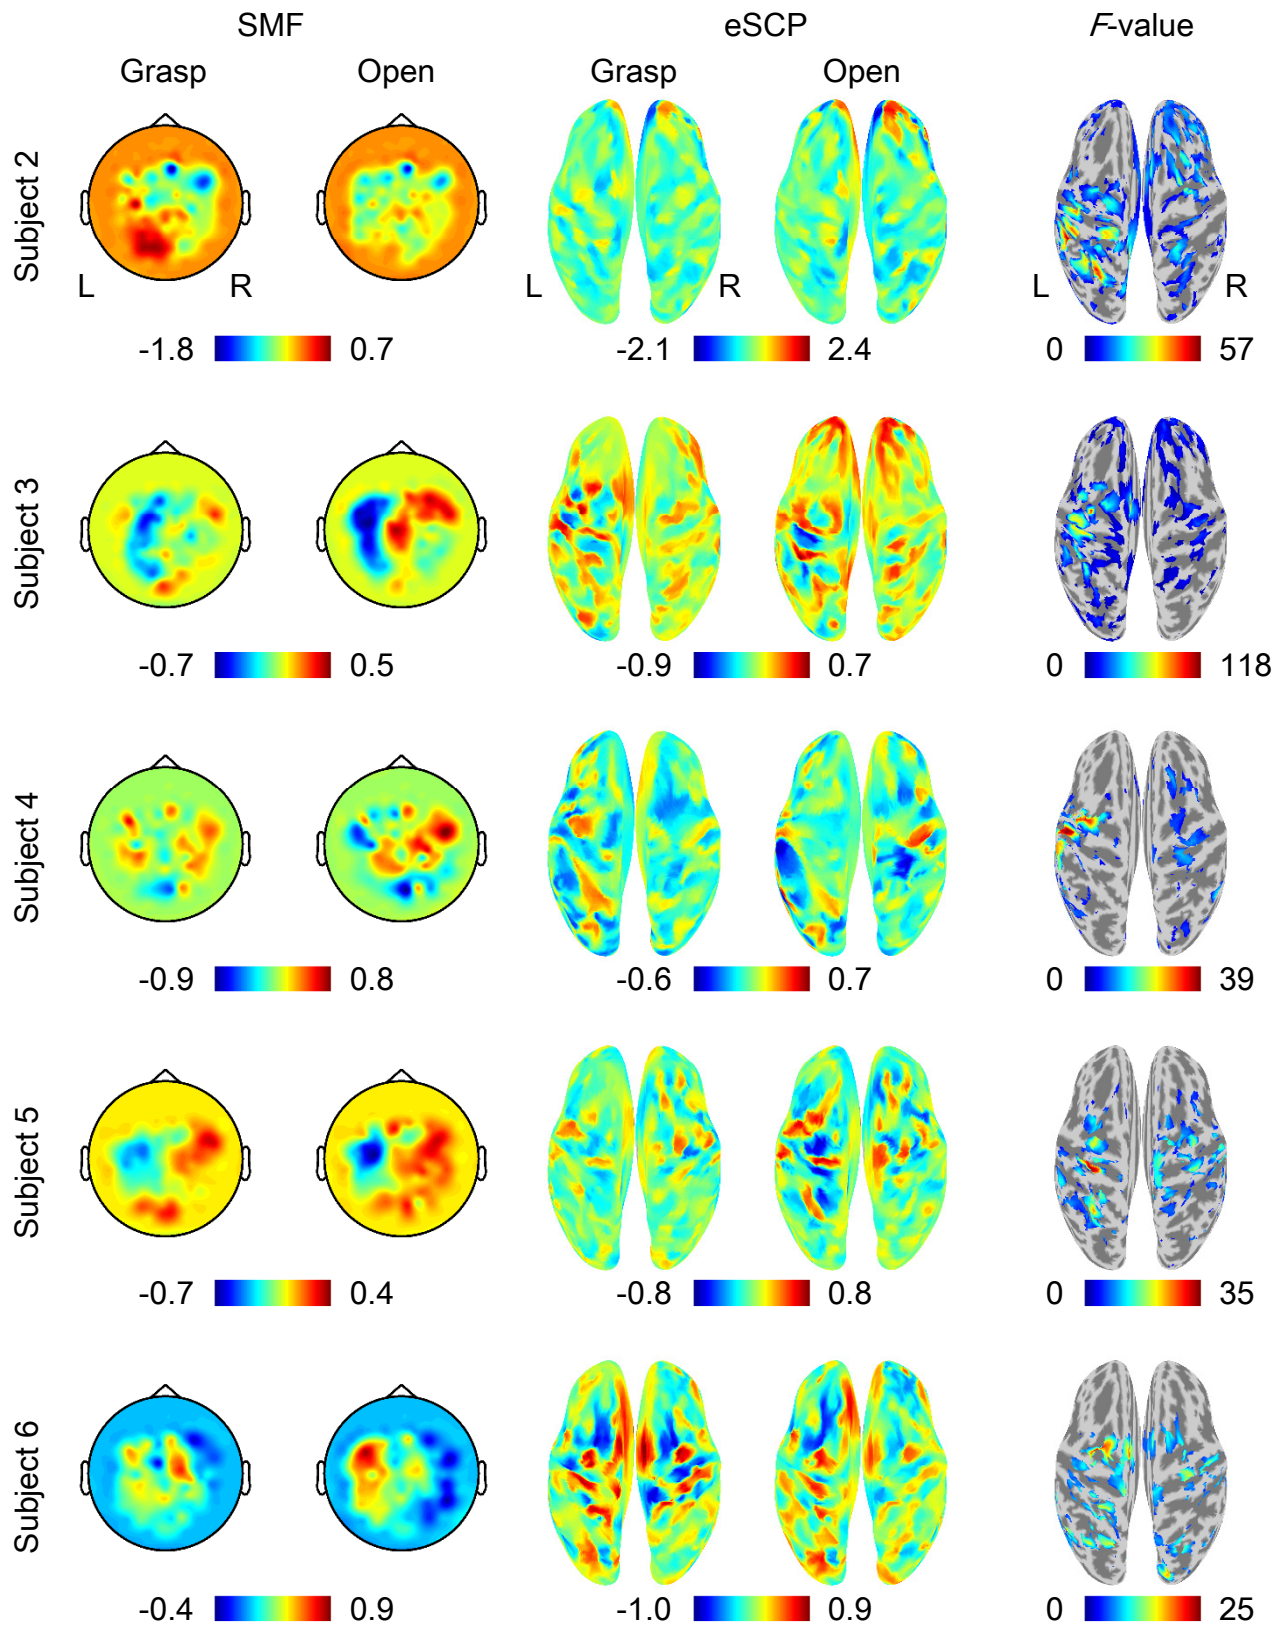

**S1 Fig. Movement-type specific activation during the open-loop session.** SMF, eSCP, and  $F$ -value at the timing of execution cue are shown for subjects 2 to 6.
