# Supplementary material for: Closed-Loop Control of a Neuroprosthetic Hand by Magnetoencephalographic Signals
Source: PubMed Central journal article supplement (PMC4489903; doi:10.1371/journal.pone.0131547), 2015-07-02
Supplement: pone.0131547.s002.pdf [file pone.0131547.s002.pdf]

**S1 Table. Summary of movement type classification and movement onset detection results using SMF.**

| Subject | Classification   | Detection of movement onset |                 |                 |
|---------|------------------|-----------------------------|-----------------|-----------------|
|         | of movement type | Accuracy (%)                | Sensitivity (%) | Specificity (%) |
| 1       | 86.3**           | 89.0                        | 91.3            | < 0.001         |
| 2       | 90.0**           | 97.4                        | 96.3            | < 0.001         |
| 3       | 82.5**           | 84.6                        | 81.3            | < 0.001         |
| 4       | 58.8             | 75.0                        | 75.0            | < 0.001         |
| 5       | 63.8**           | 82.1                        | 83.8            | < 0.001         |
| 6       | 68.8**           | 80.9                        | 85.0            | < 0.001         |

\*\**p* < 0.01 as compared to chance (50%); *p*-value: *p*-value of one-sided Fisher's exact test.
