# Supplementary material for: Closed-Loop Control of a Neuroprosthetic Hand by Magnetoencephalographic Signals
Source: PubMed Central journal article supplement (PMC4489903; doi:10.1371/journal.pone.0131547), 2015-07-02
Supplement: pone.0131547.s003.pdf [file pone.0131547.s003.pdf]

**S2 Table. Summary of accuracy to classify movement type using eSCP.**

| Subject | Classification accuracy of movement type (%) |                  |
|---------|----------------------------------------------|------------------|
|         | Contralateral eSCP                           | Ipsilateral eSCP |
| 1       | 87.5**                                       | 57.5             |
| 2       | 82.5**                                       | 72.5**           |
| 3       | 87.5**                                       | 71.3**           |
| 4       | 68.8**                                       | 37.5             |
| 5       | 68.8**                                       | 62.5*            |
| 6       | 63.8**                                       | 47.5             |

\* $p < 0.05$ , \*\* $p < 0.01$  as compared to chance (50%).
