# Supplementary material for: Closed-Loop Control of a Neuroprosthetic Hand by Magnetoencephalographic Signals
Source: PubMed Central journal article supplement (PMC4489903; doi:10.1371/journal.pone.0131547), 2015-07-02
Supplement: pone.0131547.s004.pdf [file pone.0131547.s004.pdf]

**S3 Table. Details of closed-loop prosthetic hand control.**

| Subject | Decoding of movement type |                      | Detection of movement onset |         |         |         | <i>p</i> -value |
|---------|---------------------------|----------------------|-----------------------------|---------|---------|---------|-----------------|
|         | # of correct movements    | # of total movements | # of TP                     | # of FP | # of FN | # of TN |                 |
| 1       | 10                        | 12                   | 15                          | 6       | 2       | 11      | 0.002           |
| 2       | 13                        | 18                   | 17                          | 12      | 3       | 8       | 0.078           |
| 3       | 10                        | 13                   | 14                          | 5       | 7       | 12      | 0.024           |
| 4       | 11                        | 21                   | 16                          | 10      | 9       | 10      | 0.261           |
| 5       | 6                         | 10                   | 10                          | 6       | 9       | 9       | 0.350           |
| 6       | 11                        | 14                   | 14                          | 6       | 4       | 12      | 0.009           |

TP: true positive, TN: true negative, FP: false positive, FN: false negative for onset detection; *p*-value: *p*-value of one-sided Fisher's exact test.
